# Supplementary material
Source: PubMed Central journal article supplement (PMC3422012)
Supplement: MCB.00455-12_zmb999109636so1.pdf [file MCB.00455-12_zmb999109636so1.pdf]

| Bait Gene Name          | Hit Gene Name | Protein Acc  | Mascot Score | Total Peptides | Unique Peptides | Coverage (%) |
|-------------------------|---------------|--------------|--------------|----------------|-----------------|--------------|
| ZNF598 (N-Flag)         | ZNF598        | NP_835461    | 2364         | 36             | 318             | 46.8         |
| ZNF598 (N-Flag)         | USP9X         | NP_001034679 | 1686         | 31             | 58              | 15.8         |
| ZNF598 (N-Flag)         | GIGYF2        | NP_056390    | 1490         | 27             | 56              | 22.9         |
| ZNF598 (N-Flag)         | EIF4E2/4EHP   | NP_004837    | 381          | 7              | 13              | 38           |
| GIGYF2 (N-Flag)         | GIGYF2        | NP_056390    | 2198         | 41             | 120             | 34           |
| GIGYF2 (N-Flag)         | EIF4E2        | NP_004837    | 718          | 12             | 44              | 62.9         |
| GIGYF2 (N-Flag)         | ZNF598        | NP_835461    | 404          | 6              | 10              | 9.3          |
| 4EHP-benzonase (N-Flag) | GIGYF2        | NP_056390    | 1262         | 23             | 79              | 19           |
| 4EHP-benzonase (N-Flag) | ZNF598        | NP_835461    | 755          | 11             | 26              | 15.3         |
| 4EHP-benzonase (N-Flag) | GIGYF1        | NP_072096    | 525          | 9              | 32              | 13           |
| 4EHP-benzonase (N-Flag) | EIF4E2/4EHP   | NP_004837    | 308          | 6              | 25              | 26.9         |
| 4EHP-benzonase (N-Flag) | EIF4ENIF1/4ET | NP_062817    | 294          | 5              | 10              | 6.8          |
| 4EHP (N-Flag)           | GIGYF2        | NP_056390    | 1525         | 30             | 88              | 27.8         |
| 4EHP (N-Flag)           | ZNF598        | NP_835461    | 555          | 9              | 14              | 19           |
| 4EHP (N-Flag)           | EIF4E2        | NP_004837    | 459          | 8              | 46              | 46.1         |
| 4EHP (N-Flag)           | GIGYF1        | NP_072096    | 113          | 3              | 3               | 6.1          |

**Supplementary Table 1:** Detailed mass spectrometric evidence for the protein-protein interactions. The indicated N-terminally FLAG-tagged protein was purified from a stable cell pool, and the interacting partners were identified by mass spectrometry. This table lists all the interactions which passed the following filters: Minimum number of unique peptides = 5; Minimum number of spectra = 10; Maximum frequency in a protein database of HEK293 AP-MS data generated in the Gingras lab (which contains > 2000 samples) = 22%. The interaction between 4EHP not treated with benzonase and GIGYF1 did not pass these filters, and is grayed out.
